# Supplementary material for: Molecular action of pyriproxyfen: Role of the Methoprene-tolerant protein in the pyriproxyfen-induced sterilization of adult female mosquitoes
Source: PubMed Central journal article supplement (PMC7485974; doi:10.1371/journal.pntd.0008669), 2020-08-31
Supplement: pntd.0008669.s008.pdf [file pntd.0008669.s008.pdf]

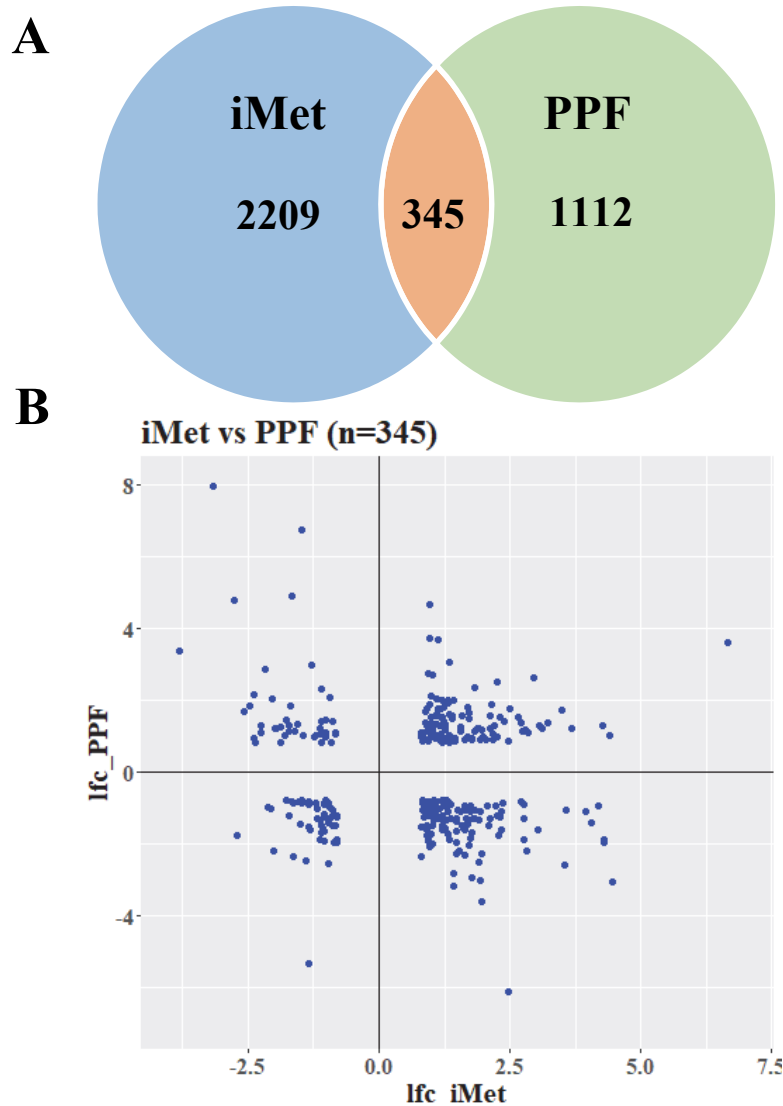

**S8 Fig. Differential expression of Met-dependent genes in response to PPF treatment.**

(A) An overlap between genes that were modulated by PPF treatment and those that were affected by depletion of Met (iMet) in the previtellogenic fat body. The Met-dependent genes were reported by Zou et al. [54]. (B) Scatter plot of the 345 PPF genes that were significantly altered in response to both PPF treatment and RNAi-mediated knockdown of Met. Log<sub>2</sub> fold changes (lfc) of iMet (Met RNAi vs control RNAi) were shown in X axis, whereas log<sub>2</sub> fold changes after PPF exposure (PPF treatment vs control treatment) were represented in Y axis. Each dot illustrates a single gene.
