# Supplementary material for: Molecular action of pyriproxyfen: Role of the Methoprene-tolerant protein in the pyriproxyfen-induced sterilization of adult female mosquitoes
Source: PubMed Central journal article supplement (PMC7485974; doi:10.1371/journal.pntd.0008669), 2020-08-31
Supplement: pntd.0008669.s010.pdf [file pntd.0008669.s010.pdf]

**S1 Table. Dose-dependent effect of PPF on *Ae. aegypti* reproduction**

| Groups                      | % Mortality                | % Blood-fed               | Eggs/Female                 | Hatching rate              | Relative reproduction rate |
|-----------------------------|----------------------------|---------------------------|-----------------------------|----------------------------|----------------------------|
| Untreated                   | 0.0 (±0.0)                 | 98.2 (±1.5)               | 90.0 (±4.6)                 | 88.0 (±1.0)                | -                          |
| Cyclohexane                 | 0.0 (±0.0)                 | 98.0 (±1.8)               | 91.6 (±9.5)                 | 84.0 (±1.7)                | 100                        |
| PPF 3.5 µg/cm <sup>2</sup>  | 0.9 (±1.6) <sup>ns</sup>   | 94.3 (±5.3) <sup>ns</sup> | 90.2 (±5.8) <sup>ns</sup>   | 83.0 (±6.2) <sup>ns</sup>  | 97.3 (±9.5) <sup>ns</sup>  |
| PPF 7 µg/cm <sup>2</sup>    | 1.0 (±1.7) <sup>ns</sup>   | 92.4 (±1.3) <sup>*</sup>  | 56.9 (±6.6) <sup>**</sup>   | 71.3 (±5.5) <sup>*</sup>   | 52.5 (±2.3) <sup>***</sup> |
| PPF 10.5 µg/cm <sup>2</sup> | 1.0 (±1.7) <sup>ns</sup>   | 91.4 (±2.5) <sup>*</sup>  | 56.9 (±9.3) <sup>*</sup>    | 33.7 (±3.8) <sup>***</sup> | 24.7 (±2.4) <sup>***</sup> |
| PPF 14 µg/cm <sup>2</sup>   | 1.1 (±1.9) <sup>ns</sup>   | 92.0 (±2.4) <sup>*</sup>  | 58.7 (±6.0) <sup>**</sup>   | 26.7 (±4.5) <sup>***</sup> | 20.2 (±2.5) <sup>***</sup> |
| PPF 17.5 µg/cm <sup>2</sup> | 1.8 (±0.3) <sup>ns</sup>   | 92.1 (±1.1) <sup>*</sup>  | 48.8 (±8.2) <sup>**</sup>   | 24.7 (±5.0) <sup>***</sup> | 16.0 (±5.9) <sup>***</sup> |
| PPF 26.3 µg/cm <sup>2</sup> | 1.8 (±1.6) <sup>ns</sup>   | 92.5 (±1.6) <sup>*</sup>  | 42.0 (±8.2) <sup>**</sup>   | 9.9 (±9.5) <sup>***</sup>  | 4.8 (±6.0) <sup>***</sup>  |
| PPF 35 µg/cm <sup>2</sup>   | 1.8 (±1.6) <sup>ns</sup>   | 92.1 (±2.5) <sup>*</sup>  | 20.3 (±10.6) <sup>***</sup> | 5.7 (±2.3) <sup>***</sup>  | 1.4 (±0.9) <sup>***</sup>  |
| PPF 70 µg/cm <sup>2</sup>   | 1.8 (±1.6) <sup>ns</sup>   | 92.0 (±3.0) <sup>*</sup>  | 5.7 (±3.7) <sup>***</sup>   | 0.0 (±0.0) <sup>***</sup>  | 0.0 (±0.0) <sup>***</sup>  |
| PPF 105 µg/cm <sup>2</sup>  | 7.0 (±3.5) <sup>*</sup>    | 92.3 (±1.5) <sup>*</sup>  | 7.4 (±7.5) <sup>***</sup>   | 0.0 (±0.0) <sup>***</sup>  | 0.0 (±0.0) <sup>***</sup>  |
| PPF 175 µg/cm <sup>2</sup>  | 39.1 (±11.4) <sup>**</sup> | 82.0 (±2.7) <sup>**</sup> | 4.7 (±4.0) <sup>**</sup>    | 0.0 (±0.0) <sup>***</sup>  | 0.0 (±0.0) <sup>***</sup>  |

Note: Mortality was measured at 24 h after PPF exposure. After blood-feeding, only fully engorged mosquitoes from each experimental group were kept for the measurements of eggs/female, hatching rate and relative reproduction rate determination. ns,  $p > 0.05$ ; \*,  $p < 0.05$ ; \*\*,  $p < 0.01$ ; \*\*\*,  $p < 0.001$
