# Supplementary material for: Molecular action of pyriproxyfen: Role of the Methoprene-tolerant protein in the pyriproxyfen-induced sterilization of adult female mosquitoes
Source: PubMed Central journal article supplement (PMC7485974; doi:10.1371/journal.pntd.0008669), 2020-08-31
Supplement: pntd.0008669.s011.pdf [file pntd.0008669.s011.pdf]

**S2 Table. Effect of PPF exposure on follicle/egg morphology**

| <b>Regimens</b>  | <b>Treatment</b>   | <b>Follicle length<br/>(<math>\mu\text{m}</math>)</b> | <b>Egg length (L)<br/>(<math>\mu\text{m}</math>)</b> | <b>Egg width (W)<br/>(<math>\mu\text{m}</math>)</b> | <b>Egg shape<br/>(L/W)</b>       |
|------------------|--------------------|-------------------------------------------------------|------------------------------------------------------|-----------------------------------------------------|----------------------------------|
| <b>72 h PE</b>   | <b>Untreated</b>   | 445 ( $\pm 20.4$ )                                    | 584.9 ( $\pm 17.9$ )                                 | 171.5 ( $\pm 13.4$ )                                | 3.4 ( $\pm 0.3$ )                |
|                  | <b>Cyclohexane</b> | 456.4 ( $\pm 25.1$ )                                  | 593.2 ( $\pm 25.1$ )                                 | 173.7 ( $\pm 10.1$ )                                | 3.4 ( $\pm 0.3$ )                |
|                  | <b>PPF</b>         | 211.1 ( $\pm 13.3$ ) <sup>***</sup>                   | 446.1 ( $\pm 42.6$ ) <sup>***</sup>                  | 183.3 ( $\pm 10.2$ ) <sup>***</sup>                 | 2.4 ( $\pm 0.3$ ) <sup>***</sup> |
| <b>96 h PE</b>   | <b>Untreated</b>   | 445 ( $\pm 20.4$ )                                    | 584.9 ( $\pm 17.9$ )                                 | 171.5 ( $\pm 13.4$ )                                | 3.4 ( $\pm 0.3$ )                |
|                  | <b>Cyclohexane</b> | 449.3 ( $\pm 25.6$ )                                  | 586.9 ( $\pm 28.7$ )                                 | 169.5 ( $\pm 8.5$ )                                 | 3.5 ( $\pm 0.2$ )                |
|                  | <b>PPF</b>         | 234.7 ( $\pm 14.5$ ) <sup>***</sup>                   | 457.7 ( $\pm 29.6$ ) <sup>***</sup>                  | 173.6 ( $\pm 14.4$ ) <sup>ns</sup>                  | 2.8 ( $\pm 0.3$ ) <sup>***</sup> |
| <b>0.5 h PBM</b> | <b>Untreated</b>   | 445 ( $\pm 20.4$ )                                    | 584.9 ( $\pm 17.9$ )                                 | 171.5 ( $\pm 13.4$ )                                | 3.4 ( $\pm 0.3$ )                |
|                  | <b>Cyclohexane</b> | 447.5 ( $\pm 25.0$ )                                  | 593.7 ( $\pm 23.6$ )                                 | 171.4 ( $\pm 11.4$ )                                | 3.5 ( $\pm 0.2$ )                |
|                  | <b>PPF</b>         | 237.8 ( $\pm 15.9$ ) <sup>***</sup>                   | 452.5 ( $\pm 36.5$ ) <sup>***</sup>                  | 167.0 ( $\pm 13.0$ ) <sup>ns</sup>                  | 2.6 ( $\pm 0.4$ ) <sup>***</sup> |
| <b>24 h PBM</b>  | <b>Untreated</b>   | 445 ( $\pm 20.4$ )                                    | 584.9 ( $\pm 17.9$ )                                 | 171.5 ( $\pm 13.4$ )                                | 3.4 ( $\pm 0.3$ )                |
|                  | <b>Cyclohexane</b> | 449.7 ( $\pm 23.4$ )                                  | 583.5 ( $\pm 28.6$ )                                 | 171.5 ( $\pm 9.5$ )                                 | 3.4 ( $\pm 0.2$ )                |
|                  | <b>PPF</b>         | 351.3 ( $\pm 31.2$ ) <sup>***</sup>                   | 535.5 ( $\pm 33.9$ ) <sup>***</sup>                  | 169.2 ( $\pm 10.6$ ) <sup>ns</sup>                  | 3.2 ( $\pm 0.3$ ) <sup>***</sup> |
| <b>36 h PBM</b>  | <b>Untreated</b>   | 445 ( $\pm 20.4$ )                                    | 584.9 ( $\pm 17.9$ )                                 | 171.5 ( $\pm 13.4$ )                                | 3.4 ( $\pm 0.3$ )                |
|                  | <b>Cyclohexane</b> | 452.1 ( $\pm 23.1$ )                                  | 595.7 ( $\pm 19.8$ )                                 | 168.8 ( $\pm 5.9$ )                                 | 3.5 ( $\pm 0.1$ )                |
|                  | <b>PPF</b>         | 430.4 ( $\pm 48.7$ ) <sup>*</sup>                     | 541.0 ( $\pm 37.6$ ) <sup>***</sup>                  | 172.2 ( $\pm 8.2$ ) <sup>ns</sup>                   | 3.1 ( $\pm 0.2$ ) <sup>***</sup> |

Note: Statistical differences between the PPF-treated and cyclohexane-treated mosquitoes were analyzed using paired t-test. ns,  $p > 0.05$ ; \*,  $p < 0.05$ ; \*\*,  $p < 0.01$ ; \*\*\*,  $p < 0.001$
