# Supplementary material for: Molecular action of pyriproxyfen: Role of the Methoprene-tolerant protein in the pyriproxyfen-induced sterilization of adult female mosquitoes
Source: PubMed Central journal article supplement (PMC7485974; doi:10.1371/journal.pntd.0008669), 2020-08-31
Supplement: pntd.0008669.s012.pdf [file pntd.0008669.s012.pdf]

**S3 Table. Amounts of circulating sugars after PPF exposure**

| <b>Groups</b>      | <b>Trehalose<br/>(<math>\mu\text{g}/\text{female}</math>)</b> | <b>Sucrose<br/>(<math>\mu\text{g}/\text{female}</math>)</b> | <b>Glucose<br/>(<math>\mu\text{g}/\text{female}</math>)</b> | <b>Fructose<br/>(<math>\mu\text{g}/\text{female}</math>)</b> |
|--------------------|---------------------------------------------------------------|-------------------------------------------------------------|-------------------------------------------------------------|--------------------------------------------------------------|
| <b>120 h PE</b>    |                                                               |                                                             |                                                             |                                                              |
| <b>Untreated</b>   | 5.41 ( $\pm 0.60$ )                                           | 21.24 ( $\pm 0.03$ )                                        | 11.36 ( $\pm 0.44$ )                                        | 5.16 ( $\pm 0.27$ )                                          |
| <b>Cyclohexane</b> | 5.01 ( $\pm 0.45$ )                                           | 21.37 ( $\pm 0.27$ )                                        | 11.22 ( $\pm 0.37$ )                                        | 5.48 ( $\pm 0.16$ )                                          |
| <b>PPF</b>         | 4.09 ( $\pm 0.81$ ) <sup>ns</sup>                             | 23.17 ( $\pm 0.29$ ) <sup>*</sup>                           | 13.07 ( $\pm 0.36$ ) <sup>*</sup>                           | 7.54 ( $\pm 0.12$ ) <sup>**</sup>                            |
| <b>24 h PBM</b>    |                                                               |                                                             |                                                             |                                                              |
| <b>Untreated</b>   | 3.61 ( $\pm 0.21$ )                                           | 16.07 ( $\pm 0.81$ )                                        | 6.0 ( $\pm 0.31$ )                                          | 5.50 ( $\pm 0.10$ )                                          |
| <b>Cyclohexane</b> | 3.51 ( $\pm 0.16$ )                                           | 16.11 ( $\pm 0.57$ )                                        | 6.06 ( $\pm 0.35$ )                                         | 5.72 ( $\pm 0.07$ )                                          |
| <b>PPF</b>         | 3.50 ( $\pm 0.08$ ) <sup>ns</sup>                             | 20.96 ( $\pm 0.33$ ) <sup>**</sup>                          | 7.44 ( $\pm 0.77$ ) <sup>ns</sup>                           | 6.73 ( $\pm 1.06$ ) <sup>ns</sup>                            |

Note: ns,  $p > 0.05$ ; \*,  $p < 0.05$ ; \*\*,  $p < 0.01$
